# Supplementary material for: Correction: Divergent Selection and the Evolution of Signal Traits and Mating Preferences
Source: PubMed Central journal article supplement (PMC3956494; doi:10.1371/journal.pbio.1001836), 2014-03-17

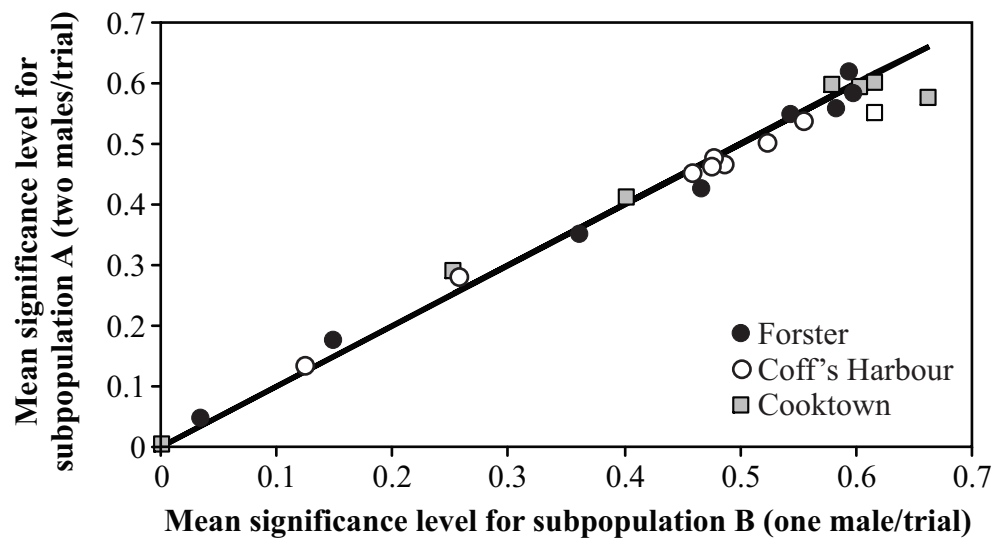

Supplement: pbio.1001836.s002.pdf [file pbio.1001836.s002.pdf]
