# Supplementary material for: Correction: Divergent Selection and the Evolution of Signal Traits and Mating Preferences
Source: PubMed Central journal article supplement (PMC3956494; doi:10.1371/journal.pbio.1001836), 2014-03-17
Supplement: pbio.1001836.s004.pdf [file pbio.1001836.s004.pdf]

**Table S2.** Media recipes for the three treatment environments.

| Ingredient               | Treatment environment |       |      |
|--------------------------|-----------------------|-------|------|
|                          | yeast                 | rice  | corn |
| water                    | 1L                    | 1L    | 1L   |
| agar                     | 19g                   | 19g   | 19g  |
| raw sugar                | 54g                   | 54g   | 54g  |
| inactivated torula yeast | 36g                   | 3.6g  | 9g   |
| rice flour               | 0g                    | 32.4g | 0    |
| corn starch              | 0g                    | 0g    | 27g  |
| nipagin*                 | 12ml                  | 12ml  | 12ml |
| propionic acid           | 6ml                   | 6ml   | 6ml  |

\*nipagin is a 10% w/v solution of methyl-4-hydrobenzoate in methanol
